# Supplementary material for: Matrix Assisted Ionization Vacuum (MAIV), a New Ionization Method for Biological Materials Analysis Using Mass Spectrometry
Source: PubMed Central journal article supplement — Mol Cell Proteomics. 2012 Dec 14;12(3):792–6. doi: 10.1074/mcp.M112.023663 (PMC3591669; doi:10.1074/mcp.m112.023663), 2012-12-14
Supplement: supp_M112.023663_mcp.M112.023663-1.pdf [file supp_M112.023663_mcp.M112.023663-1.pdf]

**Supplemental Information:**

**Matrix Assisted Ionization *Vacuum*, a New Ionization Method for  
Biological Materials Analysis using Mass Spectrometry**

Ellen D. Inutan and Sarah Trimpin

*Department of Chemistry, Wayne State University*

## I. Typical operation

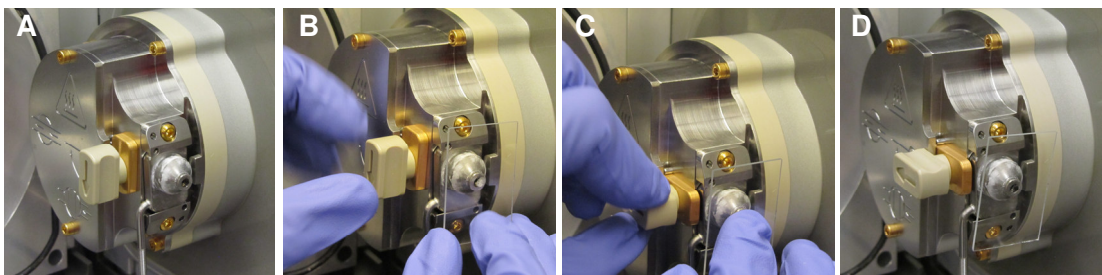

## II. Source block

### A. Small inner cone ID

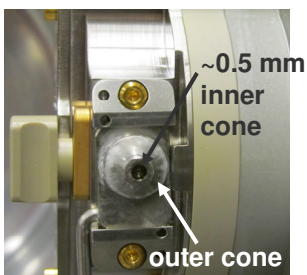

## III. Source Temperature at 50 °C

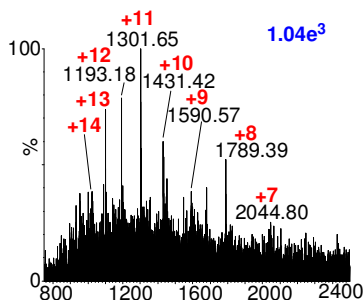

## IV. Source Temperature at 80 °C

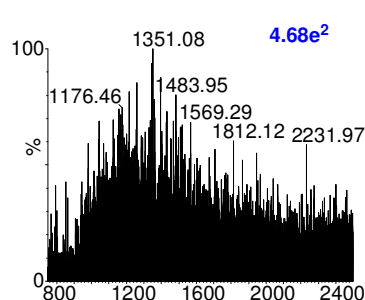

### B. Medium inner cone ID

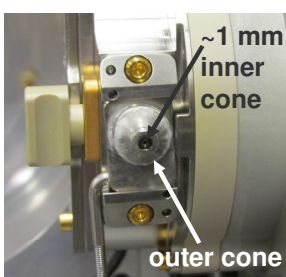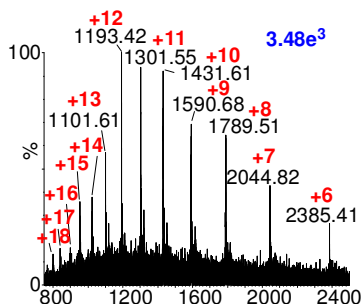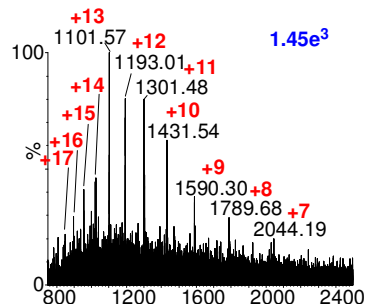

### C. Large inner cone ID

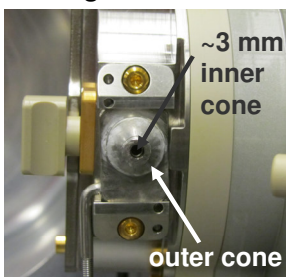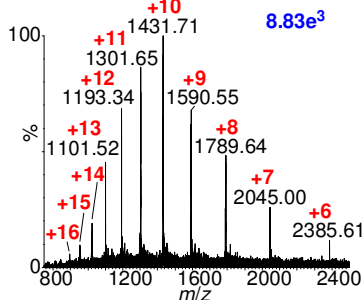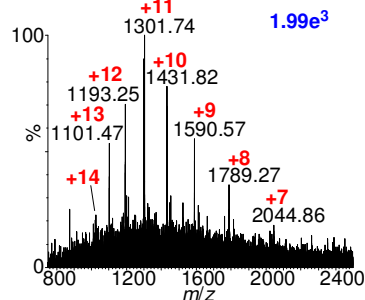

**Supplemental Figure S1.** (I) Photographs of typical operation of MAIV on the ESI source: (A) vacuum valve closed, (B) glass on, (C) vacuum valve open, (D) matrix:analyte sample enters readily mass spectrometer by vacuum forces. This custom designed MAIV source operating from atmospheric pressure conditions is a means of rapid sample introduction to the vacuum of the mass spectrometer. (II) MAIV-MS of lysozyme (MW ~14.3 kDa) in 25 mM ammonium acetate buffer in 10% MeOH on the ESI source of SYNAPT G2 using (I) a modified skimmer cone with wider outer cone (~4.5 mm ID) and inner cone of (A) ~0.5 mm, (B) ~1 mm, (C) ~3 mm ID using 3-NBN in 50:50 ACN:water with 0.1% FA acquired with a source temperature of (II) 50 °C and (II) 80 °C. Red numbers indicate the charge state and blue numbers indicate the ion abundance.
